# Supplementary material
Source: ML conference proceedings conference paper supplement (https://proceedings.neurips.cc/paper_files/paper/2012/hash/11b921ef080f7736089c757404650e40-Abstract.html)
Supplement: Supplementary file [file 11b921ef080f7736089c757404650e40-Supplemental.zip]

---

# Supplementary Material to “On Multilabel Classification and Ranking with Partial Feedback”

---

**Claudio Gentile**  
 DiSTA, Università dell’Insubria, Italy  
 claudio.gentile@uninsubria.it

**Francesco Orabona**  
 TTI Chicago, USA  
 francesco@orabona.com

## 5 Appendix

This appendix contains the proofs of all lemmas and theorems presented in the main text.

**Proof:** [Lemma 1] First observe that, for any given size  $s$ , the sequence  $Y_{s,t}^*$  must contain the  $s$  top-ranked classes in the sorted order of  $p_{i,t}$ . This is because, for any candidate sequence  $Y_s = \{j_1, j_2, \dots, j_s\}$ , we have  $\mathbb{E}_t[\ell_{a,c}(Y_t^*, Y_s)] = (1-a) \sum_{i \in Y_s} \left( c(j_i, s) - \left( \frac{a}{1-a} + c(j_i, s) \right) p_{i,t} \right)$ . If there exists  $i \in Y_s$  which is not among the  $s$ -top ranked ones, then we could replace class  $i$  in position  $j_i$  within  $Y_s$  with class  $k \notin Y_s$  such that  $p_{k,t} > p_{i,t}$  obtaining a smaller loss.

Next, we show that the optimal ordering within  $Y_{s,t}^*$  is precisely ruled by the nonincreasing order of  $p_{i,t}$ . By the sake of contradiction, assume there are  $i$  and  $k$  in  $Y_{s,t}^*$  such that  $i$  precedes  $k$  in  $Y_{s,t}^*$  but  $p_{k,t} > p_{i,t}$ . Specifically, let  $i$  be in position  $j_1$  and  $k$  be in position  $j_2$  with  $j_1 < j_2$  and such that  $c(j_1, s) > c(j_2, s)$ . Then, disregarding the common  $(1-a)$ -factor, switching the two classes within  $Y_{s,t}^*$  yields an expected loss difference of

$$\begin{aligned} & c(j_1, s) - \left( \frac{a}{1-a} + c(j_1, s) \right) p_{i,t} + c(j_2, s) - \left( \frac{a}{1-a} + c(j_2, s) \right) p_{k,t} \\ & - \left( c(j_1, s) - \left( \frac{a}{1-a} + c(j_1, s) \right) p_{k,t} \right) - \left( c(j_2, s) - \left( \frac{a}{1-a} + c(j_2, s) \right) p_{i,t} \right) \\ & = (p_{k,t} - p_{i,t}) (c(j_1, s) - c(j_2, s)) > 0, \end{aligned}$$

since  $p_{k,t} > p_{i,t}$  and  $c(j_1, s) > c(j_2, s)$ . Hence switching would get a smaller loss which leads as a consequence to  $Y_{s,t}^* = (j_1, j_2, \dots, j_s)$ .  $\square$

The algorithm in Figure 1 works by updating through the gradients  $\nabla_{i,t}$  of a modular margin-based loss function  $\sum_{i=1}^K L(\mathbf{w}_i^\top \mathbf{x})$  associated with the label generation model (2) so as to make the parameters  $(\mathbf{u}_1, \dots, \mathbf{u}_K) \in \mathcal{R}^{dK}$  therein achieve the Bayes optimality condition

$$(\mathbf{u}_1, \dots, \mathbf{u}_K) = \arg \min_{\mathbf{w}_1, \dots, \mathbf{w}_K : \mathbf{w}_i^\top \mathbf{x}_t \in D} \mathbb{E}_t \left[ \sum_{i=1}^K L(s_{i,t} \mathbf{w}_i^\top \mathbf{x}_t) \right], \quad (4)$$

where  $\mathbb{E}_t[\cdot]$  above is over the generation of  $Y_t$  in producing the sign value  $s_{i,t} \in \{-1, 0, +1\}$ , conditioned on the past (in particular, conditioned on  $\hat{Y}_t$ ). The requirement in (4) is akin to the classical construction of *proper scoring rules* in the statistical literature (e.g., [9]).

The following lemma faces the problem of hand-crafting a convenient loss function  $L(\cdot)$  such that (4) holds.

**Lemma 5.** *Let  $\mathbf{w}_1, \dots, \mathbf{w}_K \in \mathcal{R}^{dK}$  be arbitrary weight vectors such that  $\mathbf{w}_i^\top \mathbf{x}_t \in D$ ,  $i \in [K]$ ,  $(\mathbf{u}_1, \dots, \mathbf{u}_K) \in \mathcal{R}^{dK}$  be defined in (2),  $s_{i,t}$  be the updating signs computed by the algorithm at the end (Step 5) of time  $t$ ,  $L : D = [-R, R] \subseteq \mathcal{R} \rightarrow \mathcal{R}^+$  be a convex and differentiable function of its argument, with  $g(\Delta) = -L'(\Delta)$ . Then for any  $t$  we have*

$$\mathbb{E}_t \left[ \sum_{i=1}^K L(s_{i,t} \mathbf{w}_i^\top \mathbf{x}_t) \right] \geq \mathbb{E}_t \left[ \sum_{i=1}^K L(s_{i,t} \mathbf{u}_i^\top \mathbf{x}_t) \right],$$

i.e., (4) holds.

**Proof:** Let us introduce the shorthands  $\Delta_i = \mathbf{u}_i^\top \mathbf{x}_t$ ,  $\hat{\Delta}_i = \mathbf{w}_{i,t}^\top \mathbf{x}_t$ ,  $s_i = s_{i,t}$ , and  $p_i = \mathbb{P}(y_{i,t} = 1 | \mathbf{x}_t) = \frac{L'(-\Delta_i)}{L'(\Delta_i) + L'(-\Delta_i)}$ . Moreover, let  $\mathbb{P}_t(\cdot)$  be an abbreviation for the conditional probability  $\mathbb{P}(\cdot | (y_1, \mathbf{x}_1), \dots, (y_{t-1}, \mathbf{x}_{t-1}), \mathbf{x}_t)$ . Recalling the way  $s_{i,t}$  is constructed (Figure 1), we can write

$$\begin{aligned} \mathbb{E}_t \left[ \sum_{i=1}^K L(s_{i,t} \hat{\Delta}_i) \right] &= \sum_{i \in \hat{Y}_t} \left( \mathbb{P}_t(s_{i,t} = 1) L(\hat{\Delta}_i) + \mathbb{P}_t(s_{i,t} = -1) L(-\hat{\Delta}_i) \right) + (K - |\hat{Y}_t|) L(0) \\ &= \sum_{i \in \hat{Y}_t} \left( p_i L(\hat{\Delta}_i) + (1 - p_i) L(-\hat{\Delta}_i) \right) + (K - |\hat{Y}_t|) L(0), \end{aligned}$$

For similar reasons,

$$\mathbb{E}_t \left[ \sum_{i=1}^K L(s_{i,t} \Delta_i) \right] = \sum_{i \in \hat{Y}_t} \left( p_i L(\Delta_i) + (1 - p_i) L(-\Delta_i) \right) + (K - |\hat{Y}_t|) L(0).$$

Since  $L(\cdot)$  is convex, so is  $\mathbb{E}_t \left[ \sum_{i=1}^K L(s_{i,t} \hat{\Delta}_i) \right]$  when viewed as a function of the  $\hat{\Delta}_i$ . We have that  $\frac{\partial \mathbb{E}_t \left[ \sum_{i=1}^K L(s_{i,t} \hat{\Delta}_i) \right]}{\partial \hat{\Delta}_i} = 0$  if and only if for all  $i \in \hat{Y}_t$  we have that  $\hat{\Delta}_i$  satisfies

$$p_i = \frac{L'(-\hat{\Delta}_i)}{L'(\hat{\Delta}_i) + L'(-\hat{\Delta}_i)}.$$

Since  $p_i = \frac{L'(-\Delta_i)}{L'(\Delta_i) + L'(-\Delta_i)}$ , we have that  $\mathbb{E}_t \left[ \sum_{i=1}^K L(s_{i,t} \hat{\Delta}_i) \right]$  is minimized when  $\hat{\Delta}_i = \Delta_i$  for all  $i \in [K]$ . The claimed result immediately follows.  $\square$

Let now  $\text{Var}_t(\cdot)$  be a shorthand for  $\text{Var}(\cdot | (y_1, \mathbf{x}_1), \dots, (y_{t-1}, \mathbf{x}_{t-1}), \mathbf{x}_t)$ . The following lemma shows that under additional assumptions on the loss  $L(\cdot)$ , we are afforded to bound the variance of a difference of losses  $L(\cdot)$  by the expectation of this difference. This will be key to proving the fast rates of convergence contained in the subsequent Lemma 9.

**Lemma 6.** Let  $(\mathbf{w}'_{1,t}, \dots, \mathbf{w}'_{K,t}) \in \mathcal{R}^{dK}$  be the weight vectors computed by the algorithm in Figure 1 at the beginning (Step 2) of time  $t$ ,  $s_{i,t}$  be the updating signs computed at the end (Step 5) of time  $t$ , and  $(\mathbf{u}_1, \dots, \mathbf{u}_K) \in \mathcal{R}^{dK}$  be the comparison vectors defined through (2). Let  $L : D = [-R, R] \subseteq \mathcal{R} \rightarrow \mathcal{R}^+$  be a  $C^2(D)$  convex function of its argument, with  $g(\Delta) = -L'(\Delta)$  and such that there are positive constants  $c'_L$  and  $c''_L$  with  $(L'(\Delta))^2 \leq c'_L$  and  $L''(\Delta) \geq c''_L$  for all  $\Delta \in D$ . Then for any  $i \in \hat{Y}_t$

$$0 \leq \text{Var}_t \left( L(s_{i,t} \mathbf{x}_t^\top \mathbf{w}'_{i,t}) - L(s_{i,t} \mathbf{u}_i^\top \mathbf{x}_t) \right) \leq \frac{2c'_L}{c''_L} \mathbb{E}_t \left[ L(s_{i,t} \mathbf{x}_t^\top \mathbf{w}'_{i,t}) - L(s_{i,t} \mathbf{u}_i^\top \mathbf{x}_t) \right].$$

**Proof:** Let us introduce the shorthands  $\Delta_i = \mathbf{x}_t^\top \mathbf{u}_i$ ,  $\hat{\Delta}_i = \mathbf{x}_t^\top \mathbf{w}'_{i,t}$ ,  $s_i = s_{i,t}$ , and  $p_i = \mathbb{P}(y_{i,t} = 1 | \mathbf{x}_t) = \frac{L'(-\Delta_i)}{L'(\Delta_i) + L'(-\Delta_i)}$ . Then, for any  $i \in [K]$ ,

$$\text{Var}_t \left( L(s_{i,t} \mathbf{x}_t^\top \mathbf{w}'_{i,t}) - L(s_{i,t} \mathbf{u}_i^\top \mathbf{x}_t) \right) \leq \mathbb{E}_t \left( \left( L(s_i \hat{\Delta}_i) - L(s_i \Delta_i) \right)^2 \right) \leq c'_L (\hat{\Delta}_i - \Delta_i)^2. \quad (5)$$

Moreover, for any  $i \in \hat{Y}_t$  we can write

$$\begin{aligned}
\mathbb{E}_t \left[ L(s_i \hat{\Delta}_i) - L(s_i \Delta_i) \right] &= p_i (L(\hat{\Delta}_i) - L(\Delta_i)) + (1 - p_i) (L(-\hat{\Delta}_i) - L(-\Delta_i)) \\
&\geq p_i \left( L'(\Delta_i)(\hat{\Delta}_i - \Delta_i) + \frac{c_L''}{2} (\hat{\Delta}_i - \Delta_i)^2 \right) \\
&\quad + (1 - p_i) \left( L'(-\Delta_i)(\Delta_i - \hat{\Delta}_i) + \frac{c_L''}{2} (\hat{\Delta}_i - \Delta_i)^2 \right) \\
&= p_i \frac{c_L''}{2} (\hat{\Delta}_i - \Delta_i)^2 + (1 - p_i) \frac{c_L''}{2} (\hat{\Delta}_i - \Delta_i)^2 \\
&= \frac{c_L''}{2} (\hat{\Delta}_i - \Delta_i)^2,
\end{aligned} \tag{6}$$

where the second equality uses the definition of  $p_i$ . Combining (5) with (6) gives the desired bound.  $\square$

We continue by showing a one-step regret bound for our original loss  $\ell_{a,c}$ . The precise connection to loss  $L(\cdot)$  will be established with the help of a later lemma (Lemma 9).

**Lemma 7.** *Let  $L : D = [-R, R] \subseteq \mathcal{R} \rightarrow \mathcal{R}^+$  be a convex, twice differentiable, and nonincreasing function of its argument. Let  $(\mathbf{u}_1, \dots, \mathbf{u}_K) \in \mathcal{R}^{dK}$  be defined in (2) with  $g(\Delta) = -L'(\Delta)$  for all  $\Delta \in D$ . Let also  $c_L$  be a positive constant such that*

$$\frac{L'(\Delta) L''(-\Delta) + L''(\Delta) L'(-\Delta)}{(L'(\Delta) + L'(-\Delta))^2} \geq -c_L$$

*holds for all  $\Delta \in D$ . Finally, let  $\Delta_{i,t}$  denote  $\mathbf{u}_i^\top \mathbf{x}_t$ , and  $\hat{\Delta}'_{i,t}$  denote  $\mathbf{x}_t^\top \mathbf{w}'_{i,t}$ , where  $\mathbf{w}'_{i,t}$  is the  $i$ -th weight vector computed by the algorithm at the beginning (Step 2) of time  $t$ . If time  $t$  is such that  $|\Delta_{i,t} - \hat{\Delta}'_{i,t}| \leq \epsilon_{i,t}$  for all  $i \in [K]$ , then*

$$\mathbb{E}_t[\ell_{a,c}(Y_t, \hat{Y}_t)] - \mathbb{E}_t[\ell_{a,c}(Y_t, Y_t^*)] \leq 2(1-a)c_L \sum_{i \in \hat{Y}_t} \epsilon_{i,t}.$$

**Proof:** Introduce the shorthand notation  $p(\Delta) = \frac{g(-\Delta)}{g(\Delta) + g(-\Delta)}$ . We can write

$$\begin{aligned}
&\mathbb{E}_t[\ell_{a,c}(Y_t, \hat{Y}_t)] - \mathbb{E}_t[\ell_{a,c}(Y_t, Y_t^*)] \\
&= (1-a) \sum_{i \in \hat{Y}_t} \left( c(\hat{j}_i, |\hat{Y}_t|) - \left( \frac{a}{1-a} + c(\hat{j}_i, |\hat{Y}_t|) \right) p(\Delta_{i,t}) \right) \\
&\quad - (1-a) \sum_{i \in Y_t^*} \left( c(j_i^*, |Y_t^*|) - \left( \frac{a}{1-a} + c(j_i^*, |Y_t^*|) \right) p(\Delta_{i,t}) \right),
\end{aligned}$$

where  $\hat{j}_i$  denotes the position of class  $i$  in  $\hat{Y}_t$  and  $j_i^*$  is the position of class  $i$  in  $Y_t^*$ . Now,

$$p'(\Delta) = \frac{-g'(-\Delta)g(\Delta) - g'(\Delta)g(-\Delta)}{(g(\Delta) + g(-\Delta))^2} = \frac{-L'(\Delta)L''(-\Delta) - L'(-\Delta)L''(\Delta)}{(L'(\Delta) + L'(-\Delta))^2} \geq 0$$

since  $g(\Delta) = -L'(\Delta)$ , and  $L(\cdot)$  is convex and nonincreasing. Hence  $p(\Delta)$  is itself a nondecreasing function of  $\Delta$ . Moreover, the extra condition on  $L$  involving  $L'$  and  $L''$  is a Lipschitz condition on  $p(\Delta)$  via a uniform bound on  $p'(\Delta)$ . Hence, from  $|\Delta_{i,t} - \hat{\Delta}'_{i,t}| \leq \epsilon_{i,t}$  and the definition of  $\hat{Y}_t$  we

can write

$$\begin{aligned}
& \mathbb{E}_t[\ell_{a,c}(Y_t, \hat{Y}_t)] - \mathbb{E}_t[\ell_{a,c}(Y_t, Y_t^*)] \\
& \leq (1-a) \sum_{i \in \hat{Y}_t} \left( c(\hat{j}_i, |\hat{Y}_t|) - \left( \frac{a}{1-a} + c(\hat{j}_i, |\hat{Y}_t|) \right) p([\hat{\Delta}'_{i,t} - \epsilon_{i,t}]_D) \right) \\
& \quad - (1-a) \sum_{i \in Y_t^*} \left( c(j_i^*, |Y_t^*|) - \left( \frac{a}{1-a} + c(j_i^*, |Y_t^*|) \right) p([\hat{\Delta}'_{i,t} + \epsilon_{i,t}]_D) \right) \\
& \leq (1-a) \sum_{i \in \hat{Y}_t} \left( c(\hat{j}_i, |\hat{Y}_t|) - \left( \frac{a}{1-a} + c(\hat{j}_i, |\hat{Y}_t|) \right) p([\hat{\Delta}'_{i,t} - \epsilon_{i,t}]_D) \right) \\
& \quad - (1-a) \sum_{i \in \hat{Y}_t} \left( c(\hat{j}_i, |\hat{Y}_t|) - \left( \frac{a}{1-a} + c(\hat{j}_i, |\hat{Y}_t|) \right) p([\hat{\Delta}'_{i,t} + \epsilon_{i,t}]_D) \right) \\
& = (1-a) \sum_{i \in \hat{Y}_t} \left( c(\hat{j}_i, |\hat{Y}_t|) \left( p([\hat{\Delta}'_{i,t} + \epsilon_{i,t}]_D) - p([\hat{\Delta}'_{i,t} - \epsilon_{i,t}]_D) \right) \right) \\
& \leq 2(1-a) c_L \sum_{i \in \hat{Y}_t} \epsilon_{i,t},
\end{aligned}$$

the last inequality deriving from  $c(i, s) \leq 1$  for all  $i \leq s \leq K$ , and

$$p([\hat{\Delta}'_{i,t} + \epsilon_{i,t}]_D) - p([\hat{\Delta}'_{i,t} - \epsilon_{i,t}]_D) \leq c_L ([\hat{\Delta}'_{i,t} + \epsilon_{i,t}]_D - [\hat{\Delta}'_{i,t} - \epsilon_{i,t}]_D) \leq 2 c_L \epsilon_{i,t}. \quad \square$$

Likewise, we provide a similar bound for the ranking loss.

**Lemma 8.** *Under the same assumptions and notation as in Lemma 7, combined with the independence assumption  $\mathbb{P}_t(y_{1,t}, \dots, y_{K,t}) = \prod_{i \in [K]} p_{i,t}$ , let the Algorithm in Figure 1 be working with  $a \rightarrow 1$  and strictly decreasing cost values  $c(i, s)$ . Let  $\mathbf{w}'_{i,t}$  be the  $i$ -th weight vector computed by this algorithm at the beginning (Step 2) of time  $t$ . If this algorithm ranks classes as  $\hat{p}_{j_1,t} \geq \dots \geq \hat{p}_{j_{S_t},t} \geq 0$ , and time  $t$  is such that  $|\Delta_{i,t} - \hat{\Delta}'_{i,t}| \leq \epsilon_{i,t}$  for all  $i \in [K]$ , then*

$$\begin{aligned}
& \mathbb{E}_t[\ell_{rank,t}(Y_t, (\hat{p}_{j_1,t}, \dots, \hat{p}_{j_{S_t},t}, 0, \dots, 0))] - \mathbb{E}_t[\ell_{rank,t}(Y_t, (p_{i_1,t}, \dots, p_{i_{S_t},t}, 0, \dots, 0))] \\
& \leq 4 S_t c_L \sum_{i \in \hat{Y}_t} \epsilon_{i,t},
\end{aligned}$$

where the  $p_{i,t} = \mathbb{P}_t(y_{i,t} = 1 | \mathbf{x}_t)$  are sorted as  $p_{i_1,t} \geq \dots \geq p_{i_{S_t},t} \geq 0$ , and  $\hat{Y}_t = (j_1, j_2, \dots, j_{S_t})$ .

**Proof:** Recall the notation  $\mathbb{P}_t(\cdot) = \mathbb{P}(\cdot | \mathbf{x}_t)$ , and  $p_{i,t} = p(\Delta_{i,t}) = \frac{g(-\Delta_{i,t})}{g(\Delta_{i,t}) + g(-\Delta_{i,t})}$ . For notational convenience, in this proof we drop subscript  $t$  from  $p_{i,t}$ ,  $S_t$ ,  $y_{i,t}$ , and  $\hat{Y}_t$ . Consider  $\mathbb{E}_t[\ell_{rank,t}(Y_t, \hat{Y})]$ , and introduce the shorthand

$$p_{i,j} = p_i p_j = p_i - \mathbb{P}_t(y_i > y_j).$$

Disregarding the term  $S \sum_{i \in [K]} p_i$ , which is independent of  $\hat{Y}$ , we can write

$$\begin{aligned}
\mathbb{E}_t[\ell_{rank,t}(Y_t, \hat{Y})] &= \sum_{i,j \in \hat{Y}, i < j} \mathbb{P}_t(y_i > y_j) (\{p_i < p_j\} + \frac{1}{2} \{p_i = p_j\}) \\
&\quad + \sum_{i,j \in \hat{Y}, i < j} \mathbb{P}_t(y_j > y_i) (\{p_j < p_i\} + \frac{1}{2} \{p_j = p_i\}) - S \sum_{i \in \hat{Y}} p_i \\
&= \sum_{i,j \in \hat{Y}, i < j} (p_i - p_{i,j}) \{p_i < p_j\} + (p_i - p_{i,j}) \frac{1}{2} \{p_i = p_j\} \\
&\quad + \sum_{i,j \in \hat{Y}, i < j} (p_j - p_{i,j}) \{p_j < p_i\} + (p_j - p_{i,j}) \frac{1}{2} \{p_j = p_i\} - S \sum_{i \in \hat{Y}} p_i \\
&= \sum_{i,j \in \hat{Y}, i < j} (p_i - p_j) \{p_i < p_j\} + \frac{1}{2} (p_i - p_j) \{p_i = p_j\} + p_j - p_{i,j} - S \sum_{i \in \hat{Y}} p_i \\
&= \sum_{i,j \in \hat{Y}, i < j} (\min\{p_i, p_j\} - p_i p_j) - S \sum_{i \in \hat{Y}} p_i
\end{aligned}$$

which can be finally seen to be equal to

$$-\sum_{i \in \hat{Y}} (S+1 - \hat{j}_i) p_i - \sum_{i, j \in \hat{Y}, i < j} p_i p_j, \quad (7)$$

where  $\hat{j}_i$  is the position of class  $i$  within  $\hat{Y}_t$  in decreasing order of  $p_i$ .

Denote by  $Y_t^*$  the sequences determined by  $f^*(\mathbf{x}_t; S)$ , the optimal ranking operating on the  $p_i$ 's, and let  $\hat{j}_i$  and  $j_i^*$  be the position of class  $i$  in decreasing order of  $p_i$  within  $\hat{Y}$  and  $Y_t^*$ , respectively.

Proceeding as in Lemma 7 and recalling (7) we can write

$$\begin{aligned} & \mathbb{E}_t[\ell_{rank,t}(Y_t, \hat{f}(\mathbf{x}_t; S))] - \mathbb{E}_t[\ell_{rank,t}(Y_t, f^*(\mathbf{x}_t; S))] \\ &= \sum_{i \in Y_t^*} (S+1 - j_i^*) p_i + \sum_{i, j \in Y_t^*, i < j} p_i p_j - \sum_{i \in \hat{Y}} (S+1 - \hat{j}_i) p_i - \sum_{i, j \in \hat{Y}, i < j} p_i p_j \\ &\leq \sum_{i \in Y_t^*} (S+1 - j_i^*) p([\hat{\Delta}'_{i,t} + \epsilon_{i,t}]_D) + \sum_{i, j \in Y_t^*, i < j} p([\hat{\Delta}'_{i,t} + \epsilon_{i,t}]_D) p([\hat{\Delta}'_{j,t} + \epsilon_{j,t}]_D) \\ &\quad - \sum_{i \in \hat{Y}} (S+1 - \hat{j}_i) p([\hat{\Delta}'_{i,t} - \epsilon_{i,t}]_D) - \sum_{i, j \in \hat{Y}, i < j} p([\hat{\Delta}'_{i,t} - \epsilon_{i,t}]_D) p([\hat{\Delta}'_{j,t} - \epsilon_{j,t}]_D) \\ &\leq \sum_{i \in \hat{Y}} (S+1 - \hat{j}_i) \left( p([\hat{\Delta}'_{i,t} + \epsilon_{i,t}]_D) - p([\hat{\Delta}'_{i,t} - \epsilon_{i,t}]_D) \right) \\ &\quad + \sum_{i, j \in \hat{Y}, i < j} \left( p([\hat{\Delta}'_{i,t} + \epsilon_{i,t}]_D) p([\hat{\Delta}'_{j,t} + \epsilon_{j,t}]_D) - p([\hat{\Delta}'_{i,t} - \epsilon_{i,t}]_D) p([\hat{\Delta}'_{j,t} - \epsilon_{j,t}]_D) \right) \\ &\leq 2S c_L \sum_{i \in \hat{Y}} \epsilon_{i,t} + \sum_{i, j \in \hat{Y}, i < j} 2c_L (\epsilon_{i,t} + \epsilon_{j,t}) \\ &= 2S c_L \sum_{i \in \hat{Y}} \epsilon_{i,t} + 2(S-1) c_L \sum_{i \in \hat{Y}} \epsilon_{i,t} \\ &< 4S c_L \sum_{i \in \hat{Y}} \epsilon_{i,t}, \end{aligned}$$

as claimed.  $\square$

**Lemma 9.** Let  $L : D = [-R, R] \subseteq \mathcal{R} \rightarrow \mathcal{R}^+$  be a  $C^2(D)$  convex and nonincreasing function of its argument,  $(\mathbf{u}_1, \dots, \mathbf{u}_K) \in \mathcal{R}^{dK}$  be defined in (2) with  $g(\Delta) = -L'(\Delta)$  for all  $\Delta \in D$ , and such that  $\|\mathbf{u}_i\| \leq U$  for all  $i \in [K]$ . Assume there are positive constants  $c'_L$  and  $c''_L$  with  $(L'(\Delta))^2 \leq c'_L$  and  $L''(\Delta) \geq c''_L$  for all  $\Delta \in D$ . With the notation introduced in Figure 1, we have that

$$(\mathbf{x}^\top \mathbf{w}'_{i,t} - \mathbf{u}_i^\top \mathbf{x})^2 \leq \mathbf{x}^\top A_{i,t-1}^{-1} \mathbf{x} \left( U^2 + \frac{d c'_L}{(c''_L)^2} \ln \left( 1 + \frac{t-1}{d} \right) + \frac{12}{c''_L} \left( \frac{c'_L}{c''_L} + 3L(-R) \right) \ln \frac{K(t+4)}{\delta} \right)$$

holds with probability at least  $1 - \delta$  for any  $\delta < 1/e$ , uniformly over  $i \in [K]$ ,  $t = 1, 2, \dots$ , and  $\mathbf{x} \in \mathcal{R}^d$ .

**Proof:** For any given class  $i$ , the time- $t$  update rule  $\mathbf{w}'_{i,t} \rightarrow \mathbf{w}_{i,t+1} \rightarrow \mathbf{w}'_{i,t+1}$  in Figure 1 allows us to start off from [7] (proof of Theorem 2 therein), from which one can extract the following inequality

$$\begin{aligned} & d_{i,t-1}(\mathbf{u}_i, \mathbf{w}'_{i,t}) \\ &\leq U^2 + \frac{1}{(c''_L)^2} \sum_{k=1}^{t-1} r_{i,k} - \frac{2}{c''_L} \sum_{k=1}^{t-1} \left( \nabla_{i,k}^\top (\mathbf{w}'_{i,k} - \mathbf{u}_i) - \frac{c''_L}{2} (s_{i,k} \mathbf{x}_k^\top (\mathbf{w}'_{i,k} - \mathbf{u}_i))^2 \right), \quad (8) \end{aligned}$$

where we set  $r_{i,k} = \nabla_{i,k}^\top A_{i,k}^{-1} \nabla_{i,k}$ . Using the lower bound on the second derivative of  $L$  we have

$$\begin{aligned} & L(s_{i,k} \mathbf{x}_k^\top \mathbf{w}'_{i,k}) - L(s_{i,k} \mathbf{u}_i^\top \mathbf{x}_k) \\ &\leq L'(s_{i,k} \mathbf{x}_k^\top \mathbf{w}'_{i,k})(s_{i,k} \mathbf{x}_k^\top \mathbf{w}'_{i,k} - s_{i,k} \mathbf{u}_i^\top \mathbf{x}_k) - \frac{c''_L}{2} (s_{i,k} \mathbf{x}_k^\top \mathbf{w}'_{i,k} - s_{i,k} \mathbf{u}_i^\top \mathbf{x}_k)^2 \\ &= \nabla_{i,k}^\top (\mathbf{w}'_{i,k} - \mathbf{u}_i) - \frac{c''_L}{2} (s_{i,k} \mathbf{x}_k^\top (\mathbf{w}'_{i,k} - \mathbf{u}_i))^2. \end{aligned}$$

Plugging back into (8) yields

$$d_{i,t-1}(\mathbf{u}_i, \mathbf{w}'_{i,t}) \leq U^2 + \frac{1}{(c'_L)'^2} \sum_{k=1}^{t-1} r_{i,k} - \frac{2}{c'_L} \sum_{k=1}^{t-1} (L(s_{i,k} \mathbf{x}_k^\top \mathbf{w}'_{i,k}) - L(s_{i,k} \mathbf{u}_i^\top \mathbf{x}_k)) \quad (9)$$

We now borrow a proof technique from [4] (see also [1, 5] and references therein). Define  $L_{i,k} = L(s_{i,k} \mathbf{x}_k^\top \mathbf{w}'_{i,k}) - L(s_{i,k} \mathbf{u}_i^\top \mathbf{x}_k)$  and  $L'_{i,k} = \mathbb{E}_k[L_{i,k}] - L_{i,k}$ . Notice that the sequence of random variables  $L'_{i,1}, L'_{i,2}, \dots$ , forms a martingale difference sequence such that, for any  $i \in \hat{Y}_k$ :

- i.  $\mathbb{E}_k[L_{i,k}] \geq 0$ , by Lemma 6;
- ii.  $|L'_{i,k}| \leq 2L(-R)$ , since  $L(\cdot)$  is nonincreasing over  $D$ , and  $s_{i,k} \mathbf{x}_k^\top \mathbf{w}'_{i,k}, s_{i,k} \mathbf{u}_i^\top \mathbf{x}_k \in D$ ;
- iii.  $\text{Var}_k(L'_{i,k}) = \text{Var}_k(L_{i,k}) \leq \frac{2c'_L}{c'_L} \mathbb{E}_k[L_{i,k}]$  (again, because of Lemma 6).

On the other hand, when  $i \notin \hat{Y}_k$  then  $s_{i,k} = 0$ , and the above three properties are trivially satisfied. Under the above conditions, we are in a position to apply any fast concentration result for bounded martingale difference sequences. For instance, setting for brevity  $B = B(t, \delta) = 3 \ln \frac{K(t+4)}{\delta}$ , [8] allows us derive the inequality

$$\sum_{k=1}^{t-1} \mathbb{E}_k[L_{i,k}] - \sum_{k=1}^{t-1} L_{i,k} \geq \max \left\{ \sqrt{\frac{8c'_L}{c'_L} B \sum_{k=1}^{t-1} \mathbb{E}_k[L_{i,k}]}, 6L(-R) B \right\},$$

that holds with probability at most  $\frac{\delta}{Kt(t+1)}$  for any  $t \geq 1$ . We use the inequality  $\sqrt{cb} \leq \frac{1}{2}(c+b)$  with  $c = \frac{4c'_L}{c'_L} B$ , and  $b = 2 \sum_{k=1}^{t-1} \mathbb{E}_k[L_{i,k}]$ , and simplify. This gives

$$-\sum_{k=1}^{t-1} L_{i,k} \leq \left( \frac{2c'_L}{c'_L} + 6L(-R) \right) B$$

with probability at least  $1 - \frac{\delta}{Kt(t+1)}$ . Using the Cauchy-Schwarz inequality

$$(\mathbf{x}^\top \mathbf{w}'_{i,t} - \mathbf{u}_i^\top \mathbf{x})^2 \leq \mathbf{x}^\top A_{i,t-1}^{-1} \mathbf{x} d_{i,t-1}(\mathbf{u}_i, \mathbf{w}'_{i,t})$$

holding for any  $\mathbf{x} \in \mathcal{R}^d$ , and replacing back into (9) allows us to conclude that

$$(\mathbf{x}^\top \mathbf{w}'_{i,t} - \mathbf{u}_i^\top \mathbf{x})^2 \leq \mathbf{x}^\top A_{i,t-1}^{-1} \mathbf{x} \left( U^2 + \frac{1}{(c'_L)'^2} \sum_{k=1}^{t-1} r_{i,k} + \frac{12}{c'_L} \left( \frac{c'_L}{c'_L} + 3L(-R) \right) \ln \frac{K(t+4)}{\delta} \right) \quad (10)$$

holds with probability at least  $1 - \frac{\delta}{Kt(t+1)}$ , uniformly over  $\mathbf{x} \in \mathcal{R}^d$ .

The bounds on  $\sum_{k=1}^{t-1} r_{i,k}$  can be obtained in a standard way. Applying known inequalities (e.g., [2, 3, 5, 7]), and using the fact that  $\nabla_{i,k} = L'(s_{i,k} \mathbf{x}_k^\top \mathbf{w}'_{i,k}) s_{i,k} \mathbf{x}_k$  we have

$$\begin{aligned} \sum_{k=1}^{t-1} r_{i,k} &= \sum_{k=1}^{t-1} |s_{i,k}| (L'(s_{i,k} \mathbf{x}_k^\top \mathbf{w}'_{i,k}))^2 \mathbf{x}_k^\top A_{i,k}^{-1} \mathbf{x}_k \\ &\leq c'_L \sum_{k=1}^{t-1} |s_{i,k}| \mathbf{x}_k^\top A_{i,k}^{-1} \mathbf{x}_k \\ &\leq c'_L \sum_{k=1}^{t-1} \ln \frac{|A_{i,k}|}{|A_{i,k-1}|} \\ &= c'_L \ln \frac{|A_{i,t-1}|}{|A_{i,0}|} \\ &\leq d c'_L \ln \left( 1 + \frac{t-1}{d} \right). \end{aligned}$$

Piecing together as in (10) and stratifying over  $t = 1, 2, \dots$ , and  $i \in [K]$  concludes the proof.  $\square$

We are now ready to put all pieces together.

**Proof:** [Theorem 2] From Lemma 7 and Lemma 9, we see that with probability at least  $1 - \delta$ ,

$$R_T \leq 2(1-a)c_L \sum_{t=1}^T \sum_{i \in \hat{Y}_t} \epsilon_{i,t}, \quad (11)$$

when  $\epsilon_{i,t}^2$  is the one given in Figure 1. We continue by proving a pointwise upper bound on the sum in the RHS. More in detail, we will find an upper bound on  $\sum_{t=1}^T \sum_{i \in \hat{Y}_t} \epsilon_{i,t}^2$ , and then derive a resulting upper bound on the RHS of (11).

From Lemma 9 and the update rule (Step 5) of the algorithm we can write

$$\begin{aligned} \epsilon_{i,t}^2 &\leq C \mathbf{x}_t^\top A_{i,t-1}^{-1} \mathbf{x}_t \\ &= C \frac{\mathbf{x}_t^\top (A_{i,t-1} + |s_{i,t}| \mathbf{x}_t \mathbf{x}_t^\top)^{-1} \mathbf{x}_t}{1 - |s_{i,t}| \mathbf{x}_t^\top (A_{i,t-1} + |s_{i,t}| \mathbf{x}_t \mathbf{x}_t^\top)^{-1} \mathbf{x}_t} \\ &= C \frac{\mathbf{x}_t^\top A_{i,t}^{-1} \mathbf{x}_t}{1 - |s_{i,t}| \mathbf{x}_t^\top (A_{i,t-1} + |s_{i,t}| \mathbf{x}_t \mathbf{x}_t^\top)^{-1} \mathbf{x}_t} \\ &\leq C \frac{\mathbf{x}_t^\top A_{i,t}^{-1} \mathbf{x}_t}{1 - |s_{i,t}| \mathbf{x}_t^\top (A_0 + |s_{i,t}| \mathbf{x}_t \mathbf{x}_t^\top)^{-1} \mathbf{x}_t} \\ &= C \frac{\mathbf{x}_t^\top A_{i,t}^{-1} \mathbf{x}_t}{1 - \frac{1}{2}} \\ &= 2C \mathbf{x}_t^\top A_{i,t}^{-1} \mathbf{x}_t. \end{aligned}$$

Hence, if we set  $r_{i,t} = \mathbf{x}_t^\top A_{i,t}^{-1} \mathbf{x}_t$  and proceed as in the proof of Lemma 9, we end up with the upper bound  $\sum_{t=1}^T \epsilon_{i,t}^2 \leq 2Cd \ln(1 + \frac{T}{d})$ , holding for all  $i \in [K]$ . Denoting by  $M$  the quantity  $2Cd \ln(1 + \frac{T}{d})$ , we conclude from (11) that

$$R_T \leq 2(1-a)c_L \max \left\{ \sum_{i \in [K]} \sum_{t=1}^T \epsilon_{i,t} \mid \sum_{t=1}^T \epsilon_{i,t}^2 \leq M, \ i \in [K] \right\} = 2(1-a)c_L K \sqrt{TM},$$

as claimed.  $\square$

**Proof:** [Theorem 3] As we said, we change the definition of  $\epsilon_{i,t}^2$  in the Algorithm in Figure 1 to

$$\epsilon_{i,t}^2 = \max \left\{ \mathbf{x}_t^\top A_{i,t-1}^{-1} \mathbf{x}_t \left( \frac{2d c'_L}{(c''_L)^2} \ln \left( 1 + \frac{t-1}{d} \right) + \frac{12}{c''_L} \left( \frac{c'_L}{c''_L} + 3L(-R) \right) \ln \frac{K(t+4)}{\delta} \right), 4R^2 \right\}.$$

First, notice that the  $4R^2$  cap seamlessly applies, since  $(\mathbf{x}^\top \mathbf{w}'_{i,t} - \mathbf{u}_i^\top \mathbf{x})^2$  in Lemma 9 is bounded by  $4R^2$  anyway. With this modification, we have that Theorem 2 only holds for  $t$  such that  $\frac{d c'_L}{(c''_L)^2} \ln(1 + \frac{t-1}{d}) \geq U^2$ , i.e., for  $t \geq d \left( \exp \left( \frac{(c''_L)^2 U^2}{c'_L d} \right) - 1 \right) + 1$ , while for  $t < d \left( \exp \left( \frac{(c''_L)^2 U^2}{c'_L d} \right) - 1 \right) + 1$  we have in the worst-case scenario the maximum amount of regret at each step. From Lemma 7 we see that this maximum amount (the cap on  $\epsilon_{i,t}^2$  is needed here) can be bounded by  $4(1-a)c_L |\hat{Y}_t| R \leq 4(1-a)c_L K R$ .  $\square$

**Proof:** [Theorem 4] We start from the one step-regret delivered by Lemma 8, and proceed as in the proof of Theorem 2. This yields

$$\begin{aligned}
R_T &\leq 4 c_L \sum_{t=1}^T S_t \sum_{i \in \hat{Y}_t} \epsilon_{i,t} \\
&\leq 4 S c_L \sum_{t=1}^T \sum_{i \in \hat{Y}_t} \epsilon_{i,t} \\
&\leq 4 S c_L \sum_{t=1}^T \sum_{i \in [K]} \epsilon_{i,t} \\
&= 4 S c_L \sum_{i \in [K]} \sum_{t=1}^T \epsilon_{i,t},
\end{aligned}$$

with probability at least  $1 - \delta$ , where  $\epsilon_{i,t}^2$  is the one given in Figure 1. Let  $M$  be as in the proof of Theorem 2. If  $N_{i,T}$  denotes the total number of times class  $i$  occurs in  $\hat{Y}_t$ , we have that  $\sum_{t=1}^T \epsilon_{i,t}^2 \leq M$ , implying  $\sum_{t=1}^T \epsilon_{i,t} \leq \sqrt{N_{i,T} M}$  for all  $i \in [K]$ . Moreover,  $\sum_{i \in [K]} N_{i,T} \leq ST$ . Hence

$$R_T \leq 4 S c_L \sum_{i \in [K]} \sqrt{N_{i,T} M} \leq 4 c_L \sqrt{M S K T},$$

as claimed.  $\square$

## References

- [1] Y. Abbasi-Yadkori, D. Pal, and C. Szepesvári. Improved algorithms for linear stochastic bandits. In *25th NIPS*, 2011.
- [2] K. S. Azoury and M. K. Warmuth. Relative loss bounds for online density estimation with the exponential family of distributions. *Machine Learning*, 43, 2001.
- [3] N. Cesa-Bianchi, A. Conconi, and C. Gentile. A second-order perceptron algorithm. In *15th Annual Conference on Computational Learning Theory (COLT 2002)*, pages 121–137, 2002.
- [4] K. Crammer and C. Gentile. Multiclass classification with bandit feedback using adaptive regularization. In *28th ICML*, 2011.
- [5] O. Dekel, C. Gentile, and K. Sridharan. Robust selective sampling from single and multiple teachers. In *23rd Colt*, 2010.
- [6] K. Dembczynski, W. Waegeman, W. Cheng, and E. Hullermeier. On label dependence and loss minimization in multi-label classification. *Machine Learning*, to appear.
- [7] E. Hazan, A. Agarwal, and S. Kale. Logarithmic regret algorithms for online convex optimization. *Machine Learning*, 69(2-3):169–192, 2007.
- [8] S. Kakade and A. Tewari. On the generalization ability of online strongly convex programming algorithm. In *Nips*, 2008.
- [9] L.J. Savage. Elicitation of personal probabilities and expectations. *J. of the American Statistical Association*, 336:783–801, 1973.
